# Supplementary material for: Assessing Vocabulary Skills of School Children Aged 9 to 15 in Finland: Tracking the Gender and Home Language Gap
Source: Research Square preprint supplement (doi:10.21203/rs.3.rs-6448049/v1), 2025-05-12
Supplement: Supplementary file 1 [file 594cfe03529f076694c12a7f.docx]

**SUPPLEMENTARY MATERIAL**

**Assessing Vocabulary Skills of School Children Aged 9 to 15 in Finland: Tracking the Gender and Home Language Gap**

Raymond Bertram1*, Tomi Rautaoja2, Santeri Holopainen2, Tuomo Häikiö1, Petra Enges2, Jukka Hyönä1, Minna Lehtonen1, Kenneth R. Pugh3,4, Jay G. Rueckl3, Rosa Salmela2, Noam Siegelman5 & Pekka Räsänen2,6

1Department of Psychology and Speech-Language Pathology, University of Turku, Finland

2Turku Research Institute for Learning Analytics, University of Turku, Finland

3Department of Psychological Sciences, University of Connecticut, USA

4Yale Reading Center, Yale School of Medicine, USA

5Departments of Psychology and Cognitive and Brain Sciences, Hebrew University of Jerusalem, Israel

6Epilepsia Helsinki, Department of Pediatric Neurology, HUS Helsinki University Hospital, Finland

**Stimulus Lists (Lexize, d-Lexize89, d-Lexize55a, d-Lexize55b, d-Lexize41a, d-Lexize41b)**

**Supplementary Table 1**. All words (with English translations, ordered by increasing frequency) and pseudowords as used in different versions of Lexize.

| **Idnr** | **Item** | **Translation** | **Lexa** | **PoSb** | **L102c** | **dL89d** | **dL55ae** | **dL55bf** | **dL41ag** | **dL41bh** |
| --- | --- | --- | --- | --- | --- | --- | --- | --- | --- | --- |
| 1 | juhta | beast of burden | word | n | 1 | 1 |  | 1 |  |  |
| 2 | itara | stingy | word | a | 1 |  |  |  |  |  |
| 3 | kovera | concave | word | a | 1 |  |  |  |  |  |
| 4 | vauhko | raving | word | a | 1 | 1 | 1 |  |  | 1 |
| 5 | heltta | wattle | word | n | 1 | 1 | 1 | 1 |  | 1 |
| 6 | kiulu | pail | word | n | 1 | 1 | 1 | 1 | 1 |  |
| 7 | känsä | callus | word | n | 1 | 1 | 1 |  |  | 1 |
| 8 | kolttu | dress | word | n | 1 | 1 | 1 | 1 |  |  |
| 9 | mankua | to whine | word | v | 1 | 1 | 1 |  | 1 |  |
| 10 | kekäle | ember | word | n | 1 | 1 |  | 1 |  | 1 |
| 11 | vohkia | to nick | word | v | 1 | 1 | 1 |  |  | 1 |
| 12 | hökkeli | shack | word | n | 1 | 1 | 1 |  | 1 |  |
| 13 | houre | delirium | word | n | 1 |  |  |  |  |  |
| 14 | nyplätä | to make lace | word | v | 1 | 1 |  | 1 | 1 |  |
| 15 | uuhi | ewe | word | n | 1 |  |  |  |  |  |
| 16 | kieppi | coil | word | n | 1 |  |  |  |  |  |
| 17 | vouti | magistrate | word | n | 1 |  |  |  |  |  |
| 18 | haikara | stork | word | n | 1 | 1 | 1 |  | 1 |  |
| 19 | luikkia | to slink | word | v | 1 | 1 |  | 1 |  | 1 |
| 20 | karkelo | frolic | word | n | 1 | 1 | 1 |  |  | 1 |
| 21 | usva | haze | word | n | 1 | 1 |  | 1 |  | 1 |
| 22 | aihio | work in progress | word | n | 1 |  |  |  |  |  |
| 23 | rihkama | bauble | word | n | 1 | 1 | 1 | 1 |  | 1 |
| 24 | metku | trick | word | n | 1 | 1 | 1 |  |  | 1 |
| 25 | pytty | wooden tub | word | n | 1 | 1 |  | 1 | 1 |  |
| 26 | navakka | brisk | word | a | 1 | 1 |  | 1 | 1 |  |
| 27 | hihna | belt | word | n | 1 | 1 | 1 |  |  | 1 |
| 28 | veruke | pretext | word | n | 1 | 1 |  | 1 |  | 1 |
| 29 | keidas | oasis | word | n | 1 | 1 |  | 1 | 1 |  |
| 30 | kiikastaa | to be the problem | word | v | 1 | 1 |  | 1 | 1 |  |
| 31 | holvi | vault | word | n | 1 | 1 |  | 1 | 1 | 1 |
| 32 | hulina | razzmatazz | word | n | 1 | 1 | 1 |  | 1 |  |
| 33 | mahla | sap | word | n | 1 | 1 |  | 1 | 1 |  |
| 34 | huokea | inexpensive | word | a | 1 | 1 |  | 1 | 1 |  |
| 35 | rahvas | common people | word | n | 1 | 1 | 1 | 1 |  |  |
| 36 | uuttera | diligent | word | a | 1 | 1 | 1 |  | 1 | 1 |
| 37 | toukka | maggot | word | n | 1 | 1 | 1 | 1 | 1 |  |
| 38 | napa | belly button | word | n | 1 | 1 | 1 |  |  | 1 |
| 39 | seula | screen | word | n | 1 | 1 | 1 |  | 1 |  |
| 40 | keko | hill | word | n | 1 | 1 |  | 1 |  | 1 |
| 41 | pisara | drop | word | n | 1 | 1 |  | 1 |  |  |
| 42 | pitsi | lace | word | n | 1 | 1 |  | 1 | 1 | 1 |
| 43 | nokkela | clever | word | a | 1 | 1 | 1 | 1 | 1 |  |
| 44 | pylväs | pillar | word | n | 1 | 1 | 1 | 1 | 1 |  |
| 45 | kohtu | uterus | word | n | 1 | 1 |  | 1 |  |  |
| 46 | hauras | fragile | word | a | 1 | 1 | 1 |  |  | 1 |
| 47 | jyvä | grain | word | n | 1 | 1 | 1 |  | 1 |  |
| 48 | ahne | greedy | word | a | 1 | 1 | 1 |  |  | 1 |
| 49 | kuopus | youngest child | word | n | 1 | 1 | 1 | 1 |  | 1 |
| 50 | tyrkyttää | impose | word | v | 1 | 1 | 1 |  |  |  |
| 51 | parvi | loft | word | n | 1 | 1 | 1 | 1 |  |  |
| 52 | loukku | trap | word | n | 1 | 1 | 1 |  | 1 |  |
| 53 | purje | sail | word | n | 1 |  |  |  |  |  |
| 54 | laimea | diluted | word | a | 1 | 1 | 1 | 1 |  | 1 |
| 55 | siivu | slice | word | n | 1 | 1 | 1 | 1 |  | 1 |
| 56 | nuotio | campfire | word | n | 1 | 1 |  | 1 |  |  |
| 57 | kainalo | armpit | word | n | 1 | 1 | 1 |  | 1 |  |
| 58 | hauki | pike | word | n | 1 | 1 | 1 |  |  |  |
| 59 | taikina | dough | word | n | 1 | 1 |  | 1 |  | 1 |
| 60 | suppea | narrow | word | a | 1 |  |  |  |  |  |
| 61 | navetta | barn | word | n | 1 | 1 |  | 1 |  | 1 |
| 62 | jäykkä | stiff | word | a | 1 | 1 |  | 1 | 1 |  |
| 63 | sukeltaa | dive | word | v | 1 | 1 | 1 |  |  |  |
| 64 | rotu | race | word | n | 1 | 1 |  | 1 | 1 |  |
| 65 | haju | smell | word | n | 1 | 1 | 1 |  |  | 1 |
| 66 | liekki | flame | word | n | 1 | 1 | 1 | 1 | 1 |  |
| 67 | kosto | revenge | word | n | 1 | 1 | 1 |  | 1 |  |
| 68 | ruuhka | traffic jam | word | n | 1 | 1 |  | 1 |  | 1 |
| 69 | hahna | NA | pseudoword | NA | 1 | 1 | 1 |  | 1 |  |
| 70 | halkahtaa | NA | pseudoword | NA | 1 | 1 | 1 | 1 | 1 |  |
| 71 | hilmo | NA | pseudoword | NA | 1 | 1 | 1 |  | 1 |  |
| 72 | hirsto | NA | pseudoword | NA | 1 | 1 | 1 | 1 | 1 |  |
| 73 | jyhmys | NA | pseudoword | NA | 1 | 1 | 1 |  | 1 |  |
| 74 | kahmea | NA | pseudoword | NA | 1 | 1 | 1 | 1 |  | 1 |
| 75 | kammu | NA | pseudoword | NA | 1 | 1 |  | 1 |  | 1 |
| 76 | kapottaa | NA | pseudoword | NA | 1 | 1 | 1 | 1 |  | 1 |
| 77 | kolje | NA | pseudoword | NA | 1 |  |  |  |  |  |
| 78 | linniö | NA | pseudoword | NA | 1 | 1 | 1 |  | 1 |  |
| 79 | lukkara | NA | pseudoword | NA | 1 | 1 |  | 1 |  | 1 |
| 80 | meltainen | NA | pseudoword | NA | 1 | 1 | 1 |  | 1 |  |
| 81 | muihko | NA | pseudoword | NA | 1 | 1 | 1 |  | 1 |  |
| 82 | noikka | NA | pseudoword | NA | 1 | 1 |  | 1 |  | 1 |
| 83 | nökkelö | NA | pseudoword | NA | 1 | 1 |  | 1 |  | 1 |
| 84 | olvota | NA | pseudoword | NA | 1 | 1 | 1 |  | 1 |  |
| 85 | ouvaista | NA | pseudoword | NA | 1 | 1 | 1 |  | 1 |  |
| 86 | paaskua | NA | pseudoword | NA | 1 |  |  |  |  |  |
| 87 | pilja | NA | pseudoword | NA | 1 | 1 |  | 1 |  | 1 |
| 88 | pylökkö | NA | pseudoword | NA | 1 | 1 | 1 |  | 1 |  |
| 89 | raipulo | NA | pseudoword | NA | 1 | 1 | 1 | 1 |  | 1 |
| 90 | ruihka | NA | pseudoword | NA | 1 | 1 |  | 1 |  | 1 |
| 91 | serma | NA | pseudoword | NA | 1 |  |  |  |  |  |
| 92 | sihu | NA | pseudoword | NA | 1 |  |  |  |  |  |
| 93 | siikko | NA | pseudoword | NA | 1 | 1 | 1 |  | 1 |  |
| 94 | soilu | NA | pseudoword | NA | 1 | 1 | 1 | 1 | 1 |  |
| 95 | taipo | NA | pseudoword | NA | 1 | 1 |  | 1 |  | 1 |
| 96 | tihmontaa | NA | pseudoword | NA | 1 | 1 |  | 1 |  | 1 |
| 97 | tolju | NA | pseudoword | NA | 1 | 1 | 1 | 1 |  | 1 |
| 98 | tulvus | NA | pseudoword | NA | 1 | 1 |  | 1 |  | 1 |
| 99 | tämsä | NA | pseudoword | NA | 1 | 1 | 1 |  | 1 |  |
| 100 | ukara | NA | pseudoword | NA | 1 | 1 |  | 1 |  | 1 |
| 101 | vahnia | NA | pseudoword | NA | 1 | 1 |  | 1 |  | 1 |
| 102 | vikku | NA | pseudoword | NA | 1 | 1 | 1 | 1 | 1 |  |

a. Lexicality; b. Part of Speech; c. Lexize; d. d-Lexize89; e. d-Lexize55a; f.; d-Lexize55b g. d-Lexize41a; h. d-Lexize41b
